# Supplementary material for: Ultrathin corundum-type In2O3 nanotubes derived from orthorhombic InOOH: synthesis and formation mechanism
Source: Royal Society of Chemistry journal article supplement (doi:10.1039/b610120h), 2006-01-01
Supplement: b610120h.pdf [file b610120h.pdf]

## Electronic Supplementary Information

### Ultrathin corundum-type $\text{In}_2\text{O}_3$ nanotubes derived from orthorhombic $\text{InOOH}$ : synthesis and formation mechanism

Changlong Chen, Dairong Chen,\* Xiuling Jiao\* and Cuiqing Wang

*Department of Chemistry, Shandong University, Jinan 250100 People's Republic of China. Fax:*  
*+86-531-88364281; Tel: +86-531-88364280; E-mail: cdr@sdu.edu.cn*

#### Experimental section

In a typical experiment, 0.8 grams of  $\text{InCl}_3 \cdot 4\text{H}_2\text{O}$  was dissolved in 15.0 mL anhydrous ethanol, then 0.5 mL formamide was added to form a clear solution. Under a vigorously stirring, into the solution 1.2g of SDBS was added to form a slurry, and 15.0 mL slurry was poured into a 20.0 mL stainless steel autoclave with a lined Teflon, and heated at 140 °C for 8 h. The formed precipitate was obtained with centrifugation, washed with water and dried at 80 °C. After then the precipitate was annealed in a tubular oven at 300 °C for 0.5 h under ambient pressure.

The phase structures of the samples were identified using XRD technique on a Rigaku D/Max 2200 PC diffractometer with  $\text{CuK}\alpha$  radiation ( $\lambda=0.15418$  nm) and graphite monochromator (scan rate: 10°/min, scan step: 0.02°), and their morphology and microstructures were characterized using transmission electron microscope (TEM, JEM100-CXII) and high-resolution TEM (HRTEM, JEM-2100). The Fourier transform infrared (FT-IR) spectra were recorded on a Nicolet 5DX FF-IR spectrometer using KBr pellet technique, and the thermogravimetric analysis (TGA) was carried out on a thermal analyzer (Perkin-Elmer Diamond TG/DTA instrument) at a heating rate of 10 °C·min<sup>-1</sup> under air atmosphere.

The electronic properties of the field effect transistors (FET) devices were measured on the Keithley 4200-SCS Semiconductor Characterization System under Ar and air atmospheres, respectively. To measure the electronic properties, the samples were firstly dispersed in anhydrous ethanol (2.5 wt %) to form the suspension solution and then three drops of the suspension were dropped onto an *n*-doped silicon wafer covered with 500 nm thick  $\text{SiO}_2$ , the nanotubes self-aligned to form a thin film after the solvent evaporation, then the gold electrodes with the dimension of 28.6 mm width × 0.24 mm length were evaporated by using shadow mask, in which the *n*-type Si was used as a back gate.

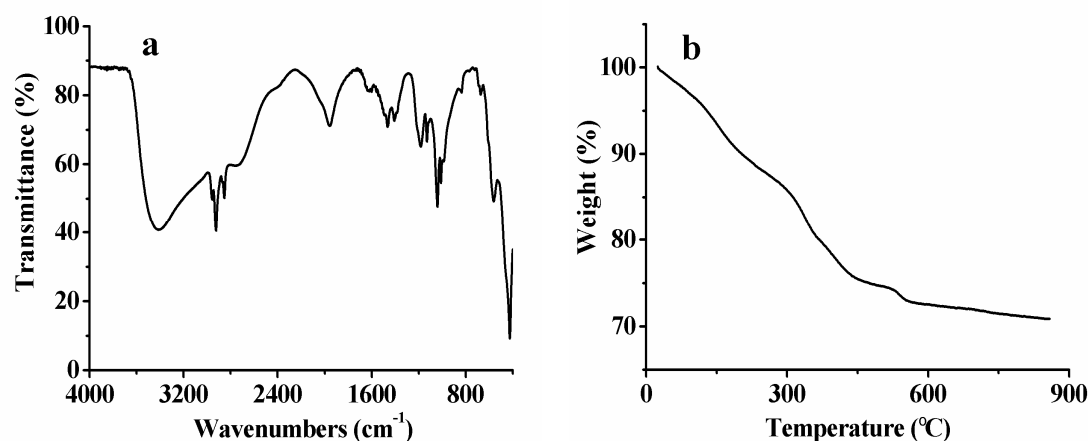

**Fig. S1.** FT-IR spectrum (a) and TG curve (b) of InOOH nanotubes. The hydrothermal reaction conditions: temperature: 140 °C, reaction time: 10 h.

The IR spectrum shows that the InOOH nanotubes contain the surfactant molecules as well as the absorbed water besides the abundant hydroxyls. The band around 500 cm<sup>-1</sup> is attributed to the In-O vibration absorption,<sup>1</sup> and those at *ca.*3000 to 2800 cm<sup>-1</sup> are assigned to the C-H vibrations of alkane chain.<sup>2</sup> The absorptions at 1600 to 1400 cm<sup>-1</sup> are due to the C=C bands of benzene ring, and that at 831 cm<sup>-1</sup> results from the C-H vibration of 1,4 substituted benzene ring.<sup>3</sup> The bands at 1200 to 1008 cm<sup>-1</sup> are the characteristics of the S-O symmetry and asymmetry vibrations of alkyl benzene sulfonate.<sup>4</sup> These confirm the existence of absorbed DBS on the InOOH nanotubes. A little absorbed water is also proved by the peak at *ca.*1610 cm<sup>-1</sup>. In addition to the strong absorption at 3400 cm<sup>-1</sup>, the O-H vibration of InOOH can also be confirmed by the broad band at 1957 cm<sup>-1</sup> and the weak one at 2720 cm<sup>-1</sup>.<sup>1,5</sup> TG analysis shows a whole weight loss of *ca.* 29% when the product is heated from room temperature to 860 °C, from which it is estimated that the content of the surfactant molecules together with the absorbed water is *ca.* 24.4%.

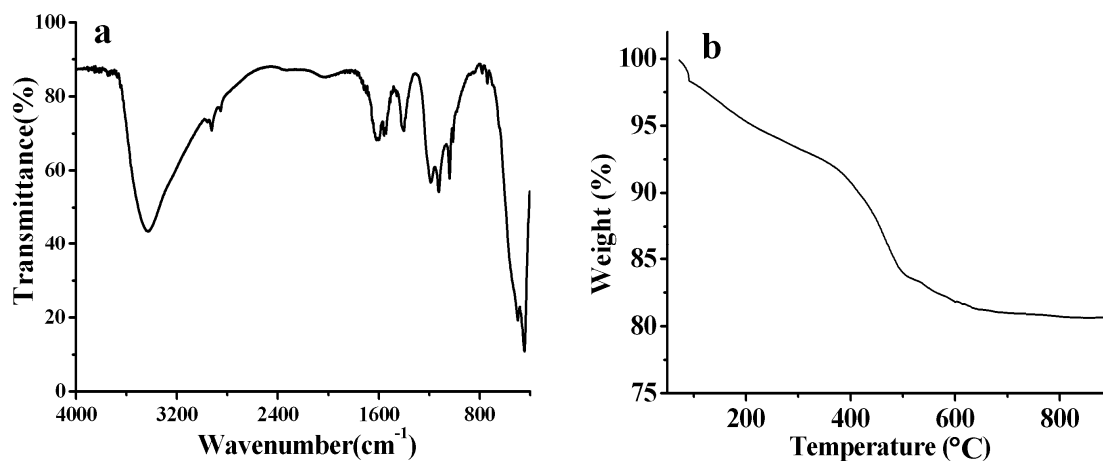

**Fig. S2.** FTIR spectrum (a) and TG curve (b) of the In<sub>2</sub>O<sub>3</sub> nanotubes.

The annealed In<sub>2</sub>O<sub>3</sub> nanotubes still contain the surfactant molecules as well as the absorbed water, which is *ca.* 18% estimated from the TGA curve. Moreover, the O-H adsorptions ((1957 cm<sup>-1</sup> and 2720 cm<sup>-1</sup>) of InOOH (Fig. S1a) after annealing treatment disappear (Fig. S2a).

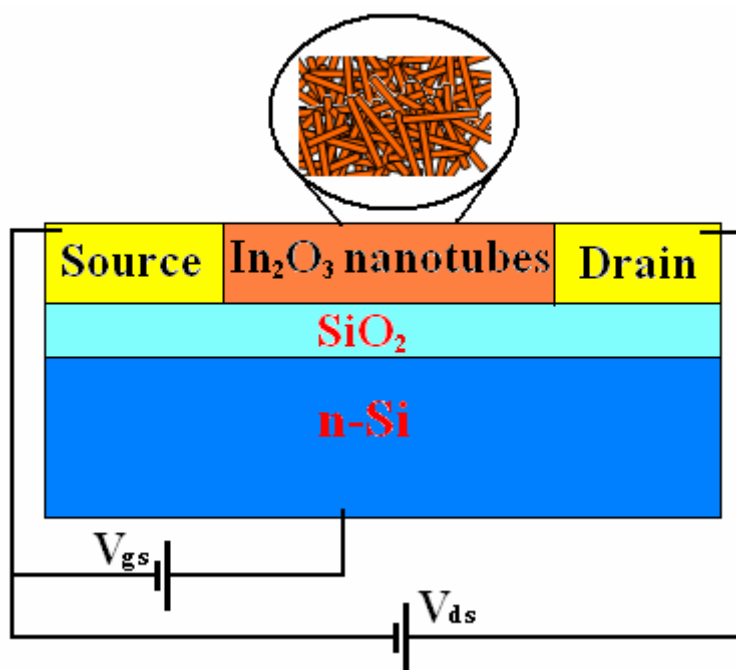

Fig. S3. Schematic cross-sectional view of the device.

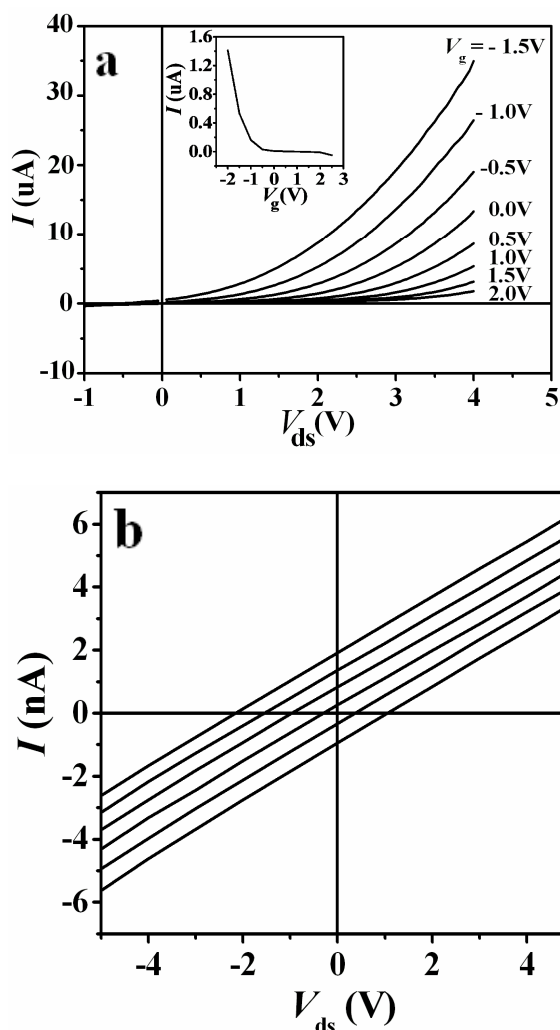

**Fig. S4.** (a) The output characteristics of the  $\text{In}_2\text{O}_3$  nanotube FET devices measured in Ar gas at room temperature. The inset is the transfer characteristic of the device measured at  $V_{\text{ds}}=50$  mV. (b) The  $I$ - $V$  curves of the InOOH nanotube FET measured in Ar gas at room temperature. The gate voltages are 5, 3, 1, 0, -1, -3, and -5 V from bottom to top.

The output characteristics of FET device measured in Ar gas at room temperature exhibit the p-type channel behavior demonstrated by the decreasing drain current ( $I_{\text{ds}}$ ) as the gate voltage ( $V_{\text{g}}$ ) steps to more positive values (Fig. S5a). It indicates the formation of strong inversion layer on the surface of the  $n$ -type  $\text{In}_2\text{O}_3$  coating, in which the concentration of carriers (holes) is much larger than the equilibrium concentration of the electron in the bulk  $\text{In}_2\text{O}_3$  coating. The transfer characteristic of the device measured at  $V_{\text{ds}}=50$  mV shows that the hole carriers are depleted when the gate voltage increases to *ca.*-0.5 V. The mobility of the

carriers is estimated to be  $20.8 \text{ cm}^2/\text{Vs}$  from the slope  $dI_{\text{ds}}/dV_{\text{g}}=1.24\times 10^{-6} \text{ A/V}$  at  $V_{\text{ds}}=0.05 \text{ V}$  as determined from the linear portion of the  $I_{\text{ds}}-V_{\text{g}}$  curve according to the linear region transistor equation,  $I_{\text{ds}}=(W/L)\mu C_0(V_{\text{g}}-V_{\text{t}})V_{\text{ds}}$ .<sup>6</sup> Such electronic properties are similar to the single-walled carbon nanotubes (SWNTs) FETs,<sup>7</sup> in which the p-type channel conduction behavior is attributed to the  $\text{O}_2$  molecules adsorption on SWNT side walls for their electron-withdrawing capability.<sup>8</sup> However, the measurement after exposure the FET devices in air for several days demonstrates that the p-type channel conduction characteristics still remain, indicating that the  $\text{O}_2$  molecules doesn't affect the transfer characteristics. The results are highly reproducible with tens of independent  $\text{In}_2\text{O}_3$  nanotubes' FETs, showing that the devices possess stable p-type channels conduction behavior.

### References

- (1) H. Zhu, K. Yao, H. Zhang, D. Yang, *J. Phys. Chem. B* 2005, **109**, 20676.
- (2) L. J. Bellamy (*Trans: W. Huang, C. Nie.*), *Infrared Spectrum of Complicated Molecules (in Chinese)*, Science Press, Beijing, 1975, p6.
- (3) *ibid*, p74.
- (4) X. Xing, S. Chen, S. Me, *The workable index of infrared spectra (in Chinese)*, Tianjin Science and Technology Press, Tianjin, 1992, p301.
- (5) V. C. Farmer, (*Trans: Y. Ying, S. Wang, C. Li, X. Han, Z. Li, Y. Li.*) *The infrared spectra of minerals (in Chinese)*, Science Press, Beijing, 1982, p119.
- (6) Y. Chen, W. Su, M. Bai, J. Jiang, X. Li, Y. Liu, L. Wang and S. Wang, *J. Am. Chem. Soc.* 2005, **127**, 15700.
- (7) (a) C. Lu, Q. Fu, S. Huang and J. Liu, *Nano Lett.* 2004, **4**, 623; (b) M. Shim, A. Javey, N. W. S. Kam and H. Dai, *J. Am. Chem. Soc.* 2001, **123**, 11512.
- (8) P. G. Collins, K. Bradley, M. Ishigami and A. Zettl, *Science* 2000, **287**, 1801; (b) S. H. Jhi, S. G. Louie and M. L. Cohen, *Phys. Rev. Lett.* 2000, **85**, 1710.
